# Supplementary material for: GCMembrane-LLM: An Evidence-Grounded Domain-Specific Large Language Model for Structure–Performance Reasoning in Graphene and Carbon Nanotube Separation Membranes
Source: MDPI journal article supplement (doi:10.3390/membranes16060214), 2026-06-21
Supplement: s1 [file membranes-4369928-supplementary.pdf › membranes-4369928-supplementary.pdf]

## Supplementary Materials

These Supplementary Materials provide detailed methodological materials to support the reproducibility and inspectability of GCMembrane-LLM, including literature retrieval, corpus screening, PDF processing, metadata preservation, QA generation, QA cleaning, LoRA supervised fine-tuning, retrieval-augmented generation, small-scale RAG retrieval relevance evaluation, benchmark construction, train–test textual isolation checking, anonymized and shuffled automatic judging, model comparison, supplementary blinded manual assessment, bootstrap confidence interval analysis, weighting sensitivity analysis, and representative RAG case study outputs. The complete 100-question benchmark dataset, anonymized and shuffled benchmark-answer table, private answer-label mapping record, model responses from GCMembrane-LLM, Llama-3.1-8B-Instruct, and Doubao-1.5-lite, Qwen judge-score logs, confidence-interval summaries, paired bootstrap difference results, train-test textual isolation records, blinded manual scoring records, small-scale RAG retrieval relevance records, and key processing scripts are provided as separate machine-readable supplementary files in .jsonl, .csv, .xlsx, .yaml, .txt, and .py formats.

Security Note: Private credentials, including API keys, access tokens, endpoint secrets, OSS access information, and account-specific authentication details, are not required for understanding the reported workflow. Users should configure these credentials in their own computing environments when reproducing API-dependent steps.

Table S1. Full OpenAlex query terms and exclusion terms used for literature retrieval.

| Category                                                | Setting or term list                                                                                                                                                                                                                                                                                                                                       |
|---------------------------------------------------------|------------------------------------------------------------------------------------------------------------------------------------------------------------------------------------------------------------------------------------------------------------------------------------------------------------------------------------------------------------|
| Database                                                | OpenAlex Works API.                                                                                                                                                                                                                                                                                                                                        |
| Record type and DOI requirement                         | Type: article; has_doi: true.                                                                                                                                                                                                                                                                                                                              |
| Publication year filter used in uploaded retrieval code | publication_year: >=2014 and publication_year: <2027. This corresponds to records from 2014 through 2026.                                                                                                                                                                                                                                                  |
| Ranking criterion                                       | cited_by_count:desc.                                                                                                                                                                                                                                                                                                                                       |
| Maximum retrieval limit in uploaded code                | 800 records before deduplication.                                                                                                                                                                                                                                                                                                                          |
| Core material terms                                     | "Graphene–carbon nanotube composite membrane"; "graphene/CNT composite membrane"; "GO-CNT composite membrane"; "graphene oxide–carbon nanotube hybrid membrane"; "graphene–CNT hybrid membrane"; "GO/CNT membrane"; "CNT–graphene membrane"; "CNT-GO membrane"; "graphene membrane"; "carbon nanotube membrane"; "graphene oxide membrane"; "GO membrane". |
| Application terms                                       | Desalination; water desalination; filtration; nanofiltration; ultrafiltration; reverse osmosis; forward osmosis; water purification; water treatment; wastewater treatment; ion separation; salt rejection; molecular sieving; water permeation; membrane separation.                                                                                      |
| Exclusion terms                                         | Photocatalysis; photocatalytic; hydrogen; battery; supercapacitor; sensor; electrode; CO <sub>2</sub> electrolysis; terahertz; therapy; cancer; imaging; solar cell; alloy; microplastic; MXene; MoS <sub>2</sub> ; MoS <sub>2</sub> variant spellings; molybdenum disulfide; actuator; robot; ceramic; foam; triboelectric; piezoresistive.               |
| Fields saved in retrieval                               | Title; DOI; year; citations; Is_Open_Access; journal; abstract.                                                                                                                                                                                                                                                                                            |

| Category          | Setting or term list                                                                                           |
|-------------------|----------------------------------------------------------------------------------------------------------------|
| Output            |                                                                                                                |
| Abstract handling | OpenAlex abstract_inverted_index was reconstructed into a readable abstract by sorting indexed word positions. |

Code S1. Python script template for Openalex-based literature retrieval and metadata collection.

literature retrieval.py

Table S2. Metadata fields retained for full-text processing and source traceability.

| Metadata field | Description                                                           | Use in the workflow                                                                                                 |
|----------------|-----------------------------------------------------------------------|---------------------------------------------------------------------------------------------------------------------|
| paper_id       | Unique identifier assigned to each paper in the curated corpus.       | Used for document tracking, chunk indexing, and linking extracted text to the original paper.                       |
| article_title  | Full article title associated with the source PDF.                    | Used for source display in retrieval-augmented generation and for tracing generated answers back to the literature. |
| pdf_name       | Original PDF filename of the literature document.                     | Used for file matching, document management, and verification of the source document.                               |
| page_number    | Page number from which the text was extracted.                        | Used for page-level source tracing and evidence verification during RAG-based question answering.                   |
| oss_path       | Storage path of the PDF file in Alibaba Cloud Object Storage Service. | Used to locate the original document and support reproducibility of corpus processing.                              |
| text           | Extracted and cleaned text from the corresponding page or text chunk. | Used as input for question-answer generation, vector indexing, retrieval, and answer generation.                    |

Code S2. PDF text preprocessing and Qwen-Max batch-task construction for membrane-specific QA generation.

section 2.2.py

Table S3. Workflow for membrane-specific QA generation and data cleaning.

| Stage         | Step                       | Operation                                                                               | Output                          |
|---------------|----------------------------|-----------------------------------------------------------------------------------------|---------------------------------|
| QA generation | Corpus-to-task preparation | Convert cleaned full-text corpus into Alibaba Cloud Model Studio JSONL batch-task files | JSONL batch-task files          |
| QA generation | Batch inference            | Submit JSONL batch-task files to Qwen-Max through Alibaba Cloud Model Studio            | Raw nested JSONL response files |
| QA generation | QA extraction              | Extract model-generated QA pairs from batch response contents                           | Raw membrane-specific QA pairs  |

|               |                           |                                                                                         |                               |
|---------------|---------------------------|-----------------------------------------------------------------------------------------|-------------------------------|
| Data cleaning | Format conversion         | Convert extracted QA pairs into LLaMA-Factory instruction/input/output format           | Initial SFT-format QA dataset |
| Data cleaning | Rule-based cleaning       | Remove empty records, malformed outputs, duplicated questions, and overly short answers | 28,563 candidate QA pairs     |
| Data cleaning | LLM-based quality control | Use Qwen-3.5-plus to judge KEEP or DISCARD                                              | 12,208 retained QA pairs      |

Code S3. Python script for parsing Qwen-Max batch outputs and constructing LLaMA-Factory SFT-format QA data.

clean\_jsonl(1)(1).py

Code S4. Python script for Qwen-3.5-plus-based KEEP/DISCARD quality-control filtering.

agent\_filter(1).py

Table S4. Dataset-count summary before and after QA data cleaning.

| Dataset stage            |  | Description                                                                                            | Number of QA pairs |
|--------------------------|--|--------------------------------------------------------------------------------------------------------|--------------------|
| Candidate QA dataset     |  | Membrane-specific QA pairs after JSONL parsing, format conversion, and preliminary rule-based cleaning | 28,563             |
| Removed QA pairs         |  | Invalid, duplicated, incomplete, overly short, weakly relevant, or logically inconsistent QA pairs     | 16,355             |
| Final cleaned QA dataset |  | QA pairs retained for supervised fine-tuning after Qwen-3.5-plus KEEP/DISCARD quality control          | 12,208             |
| Retention rate           |  | 12,208 / 28,563                                                                                        | 42.74%             |

Table S4a. Topic distribution of the final cleaned QA dataset used for supervised fine-tuning.

| QA type                   | Number | Proportion |
|---------------------------|--------|------------|
| membrane structure        | 3954   | 32.39%     |
| transport mechanism       | 2459   | 20.14%     |
| separation performance    | 2489   | 20.39%     |
| fouling/antifouling       | 285    | 2.33%      |
| swelling/stability        | 985    | 8.07%      |
| operating conditions      | 4188   | 34.31%     |
| scale-up/practical limits | 795    | 6.51%      |

The QA-topic distribution was obtained by rule-based multi-label keyword matching over the instruction, input, and output fields of the final cleaned SFT dataset. Because one QA record may involve more than one topic, the proportions are not mutually exclusive.

Table S4b. Manual spot-check protocol and summary for 100 sampled QA pairs.

| Item                                  | Setting or result                                                                                                                       |
|---------------------------------------|-----------------------------------------------------------------------------------------------------------------------------------------|
| Source dataset                        | Final cleaned SFT dataset                                                                                                               |
| Total SFT records                     | 12,208                                                                                                                                  |
| Sampling method                       | Random sampling                                                                                                                         |
| Random seed                           | 20260526                                                                                                                                |
| Number of inspected QA pairs          | 100                                                                                                                                     |
| Inspection criteria                   | Topic relevance to graphene/CNT membrane separations; scientific plausibility; question-answer consistency; material-system distinction |
| Decision labels                       | KEEP or FLAG                                                                                                                            |
| KEEP records                          | 89                                                                                                                                      |
| FLAG records                          | 11                                                                                                                                      |
| KEEP rate                             | 89.0%                                                                                                                                   |
| Topic relevance pass rate             | 89.0%                                                                                                                                   |
| Scientific plausibility pass rate     | 100.0%                                                                                                                                  |
| QA consistency pass rate              | 100.0%                                                                                                                                  |
| Material-system distinction pass rate | 89.0%                                                                                                                                   |
| Main flagged issue                    | Weak relevance or insufficient graphene/CNT membrane specificity                                                                        |

File S4b. Manual spot-check records for 100 sampled QA pairs.

100 QA manual spot check(1).csv.

Table S5. Full supervised fine-tuning configuration of GCMembrane-LLM.

| Parameter         | Setting                                     |
|-------------------|---------------------------------------------|
| Model path        | /mnt/workspace/models/Llama-3.1-8B-Instruct |
| Training stage    | sft                                         |
| Training mode     | do_train: true                              |
| Fine-tuning type  | lora                                        |
| LoRA target       | all                                         |
| Dataset directory | /mnt/workspace/LLaMA-Factory/data           |
| Dataset alias     | my_physics_train                            |
| Dataset file      | hegeshuju.jsonl                             |
| Dataset records   | 12,208                                      |
| Dataset fields    | instruction, input, output                  |
| Training template | Llama3                                      |
| Cutoff length     | 2048                                        |
| Learning rate     | 0.00005                                     |

|                                |                                                                   |
|--------------------------------|-------------------------------------------------------------------|
| Epochs                         | 3.0                                                               |
| Maximum samples                | 100000                                                            |
| Per-device training batch size | 2                                                                 |
| Gradient accumulation steps    | 4                                                                 |
| Learning-rate scheduler        | cosine                                                            |
| Logging steps                  | 5                                                                 |
| Save steps                     | 500                                                               |
| Warm-up ratio                  | 0.1                                                               |
| Output directory               | /mnt/workspace/LLaMA-Factory/saves/Llama-3.1-8B-Instruct/lora/sft |
| BF16                           | false                                                             |
| FP16                           | true                                                              |
| Flash attention                | auto                                                              |
| Optimizer                      | paged_adamw_8bit                                                  |
| Gradient checkpointing         | true                                                              |

---

The training template records the setting used in the submitted LLaMA-Factory training configuration, whereas inference was performed using the deployed Llama-compatible serving configuration described in the corresponding inference scripts.

File S1. LLaMA-Factory training YAML configuration.

Code\_S5\_1\_training\_yaml.yaml

File S2. LLaMA-Factory dataset registration entry.

Code\_S5\_2\_dataset\_registration.json

File S3. PEFT LoRA adapter configuration.

adapter\_config.json

Code S5. JSONL format validation script.

Code\_S5\_4\_validate\_sft\_jsonl.py

Code S5a. Python script for rule-based QA-topic distribution analysis.

Code\_S5a\_QA\_topic\_distribution.py

File S4. Final supervised fine-tuning dataset.

Supplementary\_Data\_S2\_final\_SFT\_dataset.jsonl

File S4a. QA-topic distribution of the final cleaned SFT dataset.

qa\_topic\_distribution.csv

Table S6. Metadata fields retained in the RAG workflow.

| Field name    | Description                                                | Used in                                                        |
|---------------|------------------------------------------------------------|----------------------------------------------------------------|
| paper_id      | Unique identifier assigned to each paper                   | Metadata table, chunk construction, retrieval records          |
| article_title | Full article title                                         | Source-grounded context and final source display               |
| pdf_name      | PDF filename                                               | File tracing and reproducibility                               |
| oss_path      | Alibaba Cloud OSS storage path                             | Corpus storage tracing                                         |
| page_number   | Page number recorded during PDF text extraction            | Page-level evidence tracing                                    |
| chunk_id      | Unique identifier assigned to each text chunk              | Vector indexing and retrieval                                  |
| text          | Page-level chunk text                                      | Embedding, retrieval, and source-grounded context construction |
| rank          | Retrieval rank of each returned chunk                      | Retrieval inspection                                           |
| distance      | vector distance returned by the ChromaDB similarity search | Retrieval inspection                                           |
| query         | User query used for retrieval                              | Retrieval logging                                              |

Table S6a. Scope and limitations of RAG source-grounding evaluation after supplementary retrieval relevance assessment.

| Metric                    | Definition                                                                                             | Result                                                                                                                                                                              |
|---------------------------|--------------------------------------------------------------------------------------------------------|-------------------------------------------------------------------------------------------------------------------------------------------------------------------------------------|
| top 4 retrieval relevance | Whether the retrieved top 4 records are semantically related to the input membrane science query.      | Quantified using a supplementary 30-query retrieval relevance evaluation. The RAG module achieved Hit@1 = 0.800, Hit@4 = 1.000, Precision@4 = 0.808, and MRR = 0.894.               |
| Source support rate       | Whether the generated answer sections are supported by returned article-title and page-level evidence. | Demonstrated through source-grounded answer examples with article-title and page-level source tracing. A full sentence-level source support audit was not systematically conducted. |
| unsupported claim rate    | Whether generated statements lack support from the retrieved snippets.                                 | Not systematically measured in this study.                                                                                                                                          |

This study used RAG mainly to provide article-title and page-level source tracing for membrane science answers. The supplementary 30-query evaluation quantified retrieval relevance for the top four retrieved chunks, while full sentence-level citation faithfulness, citation accuracy, source support rate, unsupported claim rate, and hallucination reduction remain future evaluation directions.

Table S6b. Small-scale RAG retrieval relevance evaluation protocol.

| Item                         | Setting                                                                        |
|------------------------------|--------------------------------------------------------------------------------|
| Number of evaluation queries | 30                                                                             |
| Query categories             | GO swelling and salt rejection; CNT transport and ion exclusion; GO/CNT hybrid |

| Item                                     | Setting                                                                                                                           |
|------------------------------------------|-----------------------------------------------------------------------------------------------------------------------------------|
|                                          | transport; fouling and antifouling; operating conditions; defects and practical limitations                                       |
| Questions per category                   | 5                                                                                                                                 |
| Retrieval setting                        | Top k = 4 retrieved chunks per query                                                                                              |
| Retrieved fields exported for inspection | query_id; category; question; rank; distance; paper_id; article_title; page_number; pdf_name; oss_path; retrieved_text            |
| Manual relevance label                   | is_relevant_gold = 1 for relevant retrieved evidence; is_relevant_gold = 0 for irrelevant retrieved evidence                      |
| Support-level labels                     | strong; partial; irrelevant                                                                                                       |
| Metrics calculated                       | Hit@1; Hit@4; Precision@4; mean reciprocal rank (MRR)                                                                             |
| Evaluation boundary                      | Retrieved-source relevance was evaluated at the chunk level. Sentence-level citation faithfulness was not systematically audited. |

Table S6c. Small-scale RAG retrieval relevance evaluation results.

| Metric      | Value | Interpretation                                                                          |
|-------------|-------|-----------------------------------------------------------------------------------------|
| Hit@1       | 0.800 | In 80.0% of the 30 queries, the first retrieved chunk was manually labeled as relevant. |
| Hit@4       | 1.000 | Every query had at least one relevant chunk within the top four retrieved results.      |
| Precision@4 | 0.808 | On average, 80.8% of the top four retrieved chunks were labeled as relevant.            |
| MRR         | 0.894 | Relevant evidence was usually ranked near the top of the retrieved list.                |

Code S6. Paper-level metadata reconstruction for RAG indexing.

Code\_S6\_1a\_metadata\_rebuild.py

Code S7. Page-level PDF text extraction, chunking, and metadata preservation.

Code\_S6\_1b\_page\_chunking.py

Code S8. Embedding generation and ChromaDB vector database indexing.

Code\_S6\_2\_embedding\_chromadb\_indexing.py

Code S9. Query retrieval, source-grounded context construction, and prompt-based answer generation.

Code\_S6\_3\_retrieval\_prompt\_generation.py

File S6b. Small-scale RAG retrieval relevance evaluation workbook.

rag\_eval\_gold\_labels\_filled\_expert.xlsx

File S6c. RAG retrieval records for the 30-query retrieval relevance evaluation.

rag\_eval\_retrieval\_records.csv

File S6d. RAG evaluation query set.

rag\_eval\_questions\_30.csv

Code S9a. Python script for batch RAG retrieval relevance evaluation.

batch\_rag\_grounding\_eval.py

Code S9b. Python script for calculating RAG retrieval relevance metrics.

calculate\_rag\_retrieval\_metrics.py

Code S10. Lightweight Flask demonstration and retrieval logging.

Code\_S6\_4\_flask\_demo.py

Table S7. Category distribution and research purposes of the 100-question GCMembraneBench benchmark.

| Category                                         | Number<br>of<br>questions | Purpose                                                                                                                                                                              |
|--------------------------------------------------|---------------------------|--------------------------------------------------------------------------------------------------------------------------------------------------------------------------------------|
| GO membrane applications and mechanisms          | 20                        | Interlayer spacing, swelling control, water flux, salt rejection, selectivity, stability, antifouling, and water-treatment applications.                                             |
| CNT membrane transport and separation mechanisms | 20                        | Low-friction water transport, CNT pore diameter, channel alignment, functionalization, ion exclusion, defects, fouling, and fabrication challenges.                                  |
| GO/CNT hybrid membrane design                    | 20                        | CNT spacer effects, CNT loading, dispersion, channel continuity, flux enhancement, swelling suppression, defect control, and hybrid membrane scalability.                            |
| Cross-material structure–performance evaluation  | 15                        | Cross-material reasoning linking pore size, interlayer spacing, surface charge, hydrophilicity, defects, thickness, stability, and testing conditions with membrane performance.     |
| Application-condition and performance evaluation | 15                        | Performance metrics, flux-rejection balance, fouling tests, stability tests, feed concentration, pressure, pH, multi-contaminant water, cost, scalability, and environmental safety. |
| Application-oriented design and troubleshooting  | 10                        | Application-oriented troubleshooting for GO, CNT, and hybrid membranes, including low flux, poor rejection, fouling, swelling, scale-up, and future application directions.          |

The six benchmark categories contain 100 questions in total.

Table S8. Unified output schema for model benchmark responses



| Field           | Description                          |
|-----------------|--------------------------------------|
| id              | Question ID in GCMembraneBench       |
| category        | Main benchmark category              |
| subtopic        | Specific membrane-related subtopic   |
| difficulty      | Question difficulty label            |
| status          | Question status                      |
| question        | Benchmark question                   |
| model_name      | Evaluated model name                 |
| answer          | Model-generated answer               |
| run_status      | Running status of the inference call |
| elapsed_seconds | Response time for each question      |

Table S9. Inference settings used for model comparison.

| Model                 | Inference mode            | Running environment       | Model setting                                              |
|-----------------------|---------------------------|---------------------------|------------------------------------------------------------|
| GCMembrane-LM         | Local inference           | Development instance      | Llama-3.1-8B-Instruct loaded with the trained LoRA adapter |
| Llama-3.1-8B-Instruct | Local inference           | Same development instance | Original base checkpoint without LoRA adapter              |
| Doubao-1.5-lite       | Online endpoint inference | Volcengine Ark endpoint   | Endpoint-based model access                                |

Table S10. Scoring rubric and normalized weights used by Qwen-3.5-plus

| Symbol | Dimension                       | Score range | Weight    | Used in final score | Evaluation focus                                                                                       |
|--------|---------------------------------|-------------|-----------|---------------------|--------------------------------------------------------------------------------------------------------|
| D      | Domain relevance                | 1–5         | 0.278     | Yes                 | Relevance to graphene, CNT, and graphene/CNT membrane research                                         |
| A      | Practical usefulness            | 1–5         | 0.222     | Yes                 | Usefulness for filtration, desalination, wastewater treatment, water purification, and membrane design |
| S      | Structure–performance reasoning | 1–5         | 0.222     | Yes                 | Ability to connect membrane structure with separation performance                                      |
| T      | Technical accuracy              | 1–5         | 0.167     | Yes                 | Scientific correctness and absence of misleading mechanisms                                            |
| L      | Practical limitation awareness  | 1–5         | 0.111     | Yes                 | Awareness of swelling, fouling, stability, cost, scale-up, and operational limits                      |
| C      | Clarity/conciseness             | 1–5         | Auxiliary | No                  | Clarity, organization, and appropriate answer length                                                   |

The clarity/conciseness dimension was retained as an auxiliary diagnostic indicator and was excluded from the final weighted overall-score calculation.

Table S10a. Automatic judge transparency settings used for GCMembraneBench evaluation.

| Item                    | Setting                                                                                                                                                                               |
|-------------------------|---------------------------------------------------------------------------------------------------------------------------------------------------------------------------------------|
| Judge model             | Qwen-3.5-plus                                                                                                                                                                         |
| API interface           | Alibaba Cloud DashScope compatible-mode API                                                                                                                                           |
| Temperature             | 0                                                                                                                                                                                     |
| Maximum output tokens   | 1600                                                                                                                                                                                  |
| Input to judge          | Benchmark question and three anonymized model-generated answers                                                                                                                       |
| Compared models         | GCMembrane-LLM, Llama-3.1-8B-Instruct, and Doubao-1.5-lite                                                                                                                            |
| Model identity handling | Model identifiers were removed from the judge prompt and replaced by anonymized answer labels.                                                                                        |
| Answer order            | For each benchmark question, the three model responses were randomly assigned to Answer A, Answer B, and Answer C.                                                                    |
| Private mapping         | The private answer-label-to-model mapping was used only after scoring to aggregate model-level results.                                                                               |
| Scoring scale           | 1 to 5                                                                                                                                                                                |
| Scored dimensions       | domain relevance, practical usefulness, structure–performance reasoning, technical accuracy, practical limitation awareness, and clarity/conciseness                                  |
| Raw judge output        | JSON-formatted dimension scores, brief reasons, and anonymized winner label                                                                                                           |
| Final reported score    | Recalculated from five domain-relevant dimensions after excluding clarity/conciseness                                                                                                 |
| Human re-scoring        | Supplementary stratified blinded manual assessment was conducted on 30 benchmark questions as a complementary human check.                                                            |
| Limitation              | The evaluation still relied on a single LLM-as-a-judge protocol, and the 30-question manual assessment did not include multiple independent raters or inter-rater agreement analysis. |

Table S10b. Score-level interpretation used for automatic judging.

| Score | Interpretation                                                                                                                                                           |
|-------|--------------------------------------------------------------------------------------------------------------------------------------------------------------------------|
| 1     | Incorrect, irrelevant, misleading, or unrelated to graphene/CNT membrane research.                                                                                       |
| 2     | Partly relevant but generic, shallow, or missing important membrane-specific information.                                                                                |
| 3     | Generally relevant and mostly correct, but limited in structure–performance reasoning, application usefulness, or practical interpretation.                              |
| 4     | Scientifically reasonable, domain-relevant, and useful, with clear graphene/CNT membrane reasoning and only minor omissions.                                             |
| 5     | Highly accurate, domain-specific, application-oriented, and clearly connects membrane structure, transport mechanism, separation performance, and practical limitations. |

Table S10c. Automatic judge dimensions and scoring focus.

| Dimension in judge script   | Corresponding manuscript dimension | Scoring focus                                                                                                                                                  |
|-----------------------------|------------------------------------|----------------------------------------------------------------------------------------------------------------------------------------------------------------|
| domain_relevance            | Domain relevance                   | Focus on graphene membranes, CNT membranes, and graphene/CNT hybrid membranes.                                                                                 |
| application_usefulness      | Practical usefulness               | Usefulness for filtration, desalination, wastewater treatment, water purification, and practical membrane design.                                              |
| structure_performance_logic | Structure–performance reasoning    | Ability to connect interlayer spacing, pore size, CNT loading, dispersion, surface chemistry, defects, thickness, or support layers with membrane performance. |
| technical_accuracy          | Technical accuracy                 | Scientific correctness and avoidance of misleading mechanisms or unsupported absolute claims.                                                                  |
| practical_limitations       | Practical limitation awareness     | Awareness of swelling, fouling, mechanical stability, chemical stability, defect control, long-term operation, cost, and scale-up.                             |
| clarity_conciseness         | Auxiliary clarity/conciseness      | Clarity, organization, and appropriate answer length. This dimension was excluded from the final reported score.                                               |

The automatic judge prompt requested Qwen-3.5-plus to evaluate the three anonymized model answers independently for each benchmark question and to return a structured JSON object containing six dimension scores, brief reasons, and an anonymized winner label. To reduce identity and position bias, model names were removed from the judge prompt, and the three responses for each question were randomly assigned to Answer A, Answer B, and Answer C. The private answer-label-to-model mapping was used only after scoring to aggregate model-level results. The raw prompt included six scored dimensions, including clarity/conciseness. For the manuscript-level quantitative comparison, the final reported weighted score was recalculated from the five domain-relevant dimensions only, after excluding clarity/conciseness as an auxiliary diagnostic indicator. The recalculated score followed the normalized formula reported in the main text: Overall score =  $0.278D + 0.222A + 0.222S + 0.167T + 0.111L$ . This recalculation was performed using the stored dimension-level scores in the anonymized judge-score table. Therefore, the benchmark results should be interpreted as anonymized and shuffled automatic comparative evaluation results under the specified LLM-as-a-judge protocol, supported by a supplementary stratified 30-question blinded manual assessment rather than as absolute expert ratings.

Table S10d. Weighting sensitivity analysis record for GCMembraneBench.

| Item                   | Setting                                             |
|------------------------|-----------------------------------------------------|
| Input judge-score file | judge_scores_qwen_testset23_anonymized_shuffled.csv |
| Analysis output file   | weight_sensitivity_analysis.csv                     |

| Item                     | Setting                                                                                                                                                                                  |
|--------------------------|------------------------------------------------------------------------------------------------------------------------------------------------------------------------------------------|
| Analysis purpose         | To examine whether the model ranking was sensitive to the weighting scheme used for the five domain-relevant dimensions.                                                                 |
| Tested weighting schemes | Reported domain-oriented weights, equal weights, technical-accuracy-emphasized weights, practical-usefulness-emphasized weights, and structure–performance-reasoning-emphasized weights. |
| Reported interpretation  | The ranking of the three models remained unchanged under the tested weighting schemes.                                                                                                   |

The weighting sensitivity analysis was conducted using the anonymized and shuffled judge-score table. The detailed score values under each weighting scheme are provided in `weight_sensitivity_analysis.csv`.

Table S10e. Question-level textual isolation check between GCMembraneBench and the retained SFT QA dataset.

| Item                                                   | Result |
|--------------------------------------------------------|--------|
| Retained SFT QA records checked                        | 12,208 |
| Benchmark questions checked                            | 100    |
| Exact textual duplicates                               | 0      |
| Very high textual overlap cases                        | 0      |
| Partial textual overlap cases                          | 2      |
| Questions with no direct textual duplication detected  | 98     |
| Mean maximum character n-gram TF-IDF cosine similarity | 0.426  |
| Maximum character n-gram TF-IDF cosine similarity      | 0.6549 |
| Mean maximum SequenceMatcher similarity                | 0.5113 |
| Maximum SequenceMatcher similarity                     | 0.7862 |

The check was designed to identify direct textual duplication and high wording overlap between the 100 benchmark questions and the complete set of 12,208 retained SFT QA records. Exact duplicates were defined after text normalization. Very high textual overlap was flagged when the character n-gram TF-IDF cosine similarity or SequenceMatcher similarity was at least 0.90, and partial textual overlap was flagged when either metric was at least 0.75. This analysis did not assess paper-level source isolation or semantic leakage because the benchmark records did not contain source-paper identifiers or DOI fields.

File S10b. Train–test textual isolation check between the 100-question GCMembraneBench and the complete 12,208-record retained SFT QA dataset.

`train_test_isolation_check_100_questions_full_12208.xlsx`

Table S10f. Category-level summary of the train–test textual isolation check.

| Category                                               | Number<br>benchmark<br>questions | of<br>Exact<br>duplicates | Very<br>overlap | high<br>Partial<br>overlap | No<br>duplication | direct |
|--------------------------------------------------------|----------------------------------|---------------------------|-----------------|----------------------------|-------------------|--------|
| CNT membrane                                           | 20                               | 0                         | 0               | 0                          | 20                |        |
| Application-condition<br>and<br>performance evaluation | 15                               | 0                         | 0               | 1                          | 14                |        |
| GO/CNT hybrid membrane<br>design                       | 20                               | 0                         | 0               | 1                          | 19                |        |
| GO membrane applications and<br>mechanisms             | 20                               | 0                         | 0               | 0                          | 20                |        |
| Application-oriented design and<br>troubleshooting     | 10                               | 0                         | 0               | 0                          | 10                |        |
| Cross-material structure–<br>performance evaluation    | 15                               | 0                         | 0               | 0                          | 15                |        |

Table S10g. Supplementary stratified blinded manual assessment protocol.

| Item                           | Setting                                                                                                |
|--------------------------------|--------------------------------------------------------------------------------------------------------|
| Source benchmark               | GCMembraneBench                                                                                        |
| Number of sampled<br>questions | 30                                                                                                     |
| Sampling strategy              | Five questions sampled from each of the six benchmark categories                                       |
| Compared models                | GCMembrane-LLM, Llama-3.1-8B-Instruct, Doubao-1.5-lite                                                 |
| Blinding strategy              | Model responses were presented using anonymized answer labels                                          |
| Score scale                    | 1 to 5                                                                                                 |
| Reported metrics               | Mean manual score and fractional win count                                                             |
| Interpretation                 | Supplementary human robustness check for the anonymized and shuffled automatic 100-question evaluation |

Table S10h. Model-level results of the supplementary stratified blinded manual assessment.

| Model                 | Mean manual score | Fractional wins |
|-----------------------|-------------------|-----------------|
| GCMembrane-LLM        | 4.060             | 14.33           |
| Llama-3.1-8B-Instruct | 4.013             | 11.83           |
| Doubao-1.5-lite       | 3.840             | 3.83            |

Table S10i. Model-level results of the anonymized and shuffled 100-question automatic evaluation.

| Model | Mean weighted score | 95% confidence interval | Fractional wins |
|-------|---------------------|-------------------------|-----------------|
|-------|---------------------|-------------------------|-----------------|

| Model                 | Mean weighted score | 95% confidence interval | Fractional wins |
|-----------------------|---------------------|-------------------------|-----------------|
| GCMembrane-LLM        | 4.237               | 4.087 to 4.378          | 62.5            |
| Llama-3.1-8B-Instruct | 3.896               | 3.778 to 4.012          | 33.5            |
| Doubao-1.5-lite       | 2.845               | 2.723 to 2.968          | 4.0             |

Mean weighted scores were calculated from five domain-relevant dimensions using the normalized weighting formula reported in the main text. Confidence intervals were estimated by bootstrap resampling with 10,000 iterations. Fractional wins account for tied winners among model responses.

Table S10j. Paired score differences from the anonymized and shuffled 100-question automatic evaluation.

| Paired comparison                           | Mean difference | paired 95% confidence interval | Interpretation      |
|---------------------------------------------|-----------------|--------------------------------|---------------------|
| GCMembrane-LLM minus Llama-3.1-8B-Instruct  | 0.341           | 0.143 to 0.533                 | Positive and stable |
| GCMembrane-LLM minus Doubao-1.5-lite        | 1.392           | 1.177 to 1.596                 | Positive and stable |
| Llama-3.1-8B-Instruct minus Doubao-1.5-lite | 1.052           | 0.897 to 1.202                 | Positive and stable |

Paired differences were calculated at the question level using the weighted overall score for the same benchmark question. A positive value indicates that the first model in the comparison achieved a higher mean score than the second model.

File S10c. Stratified 30-question blinded manual assessment workbook with sampled questions, anonymized model responses, and scoring rubric.

stratified\_manual\_blind\_30\_questions.xlsx

File S10d. Final score-only table for the stratified 30-question blinded manual assessment.

stratified\_manual\_blind\_30\_questions\_final\_scores\_only.xlsx

File S5. Complete 100-question GCMembraneBench benchmark.

testset23\_100\_application.jsonl

File S5a. Category distribution of GCMembraneBench.

benchmark\_category\_distribution.csv

File S6. Responses generated by GCMembrane-LLM.

ours\_testset23\_100\_results\_long.csv

File S7. Responses generated by the original Llama-3.1-8B-Instruct model.

lama0\_testset23\_100\_results.csv

File S8. Responses generated by Doubao-1.5-lite through the online inference endpoint.

doubao\_testset23\_100\_results.csv

File S9. Anonymized and shuffled benchmark-answer table for the 100-question automatic evaluation.

anonymized\_benchmark\_answers\_for\_judge.csv

File S9a. Private answer-label mapping table used after scoring for model-level aggregation.

anonymized\_answer\_mapping\_private.csv

File S10. Qwen-3.5-plus judge scores from the anonymized and shuffled 100-question automatic evaluation.

judge\_scores\_qwen\_testset23\_anonymized\_shuffled.csv

File S10a. Model-level summary from the anonymized and shuffled 100-question automatic evaluation.

judge\_scores\_qwen\_testset23\_anonymized\_shuffled\_summary.csv

File S10b. Bootstrap confidence intervals for model-level scores and paired score differences.

confidence\_interval\_summary\_anonymized\_shuffled.csv

File S10c. Question-level paired score differences used for bootstrap confidence-interval analysis.

bootstrap\_difference\_results\_anonymized\_shuffled.csv

File S10d. Weighting sensitivity analysis results for GCMembraneBench.

weight\_sensitivity\_analysis.csv

File S10e. Train-test textual isolation check between the 100-question GCMembraneBench and the complete 12,208-record retained SFT QA dataset.

train\_test\_isolation\_check\_100\_questions\_full\_12208.xlsx

File S10f. Stratified 30-question blinded manual assessment workbook with sampled questions, anonymized model responses, and scoring rubric.

stratified\_manual\_blind\_30\_questions.xlsx

File S10g. Final score-only table for the stratified 30-question blinded manual assessment.

stratified\_manual\_blind\_30\_questions\_final\_scores\_only.xlsx

Code S11. GCMembrane-LLM benchmark response generation on the development instance.

Code\_S10\_GCMembrane\_LLM\_response\_generation.py

Code S11a. Python script for calculating the GCMembraneBench category distribution.

Benchmark.py

Code S12. Original Llama-3.1-8B-Instruct benchmark response generation on the same development instance.

Code\_S11\_Llama\_base\_response\_generation(1).py

Code S13. Doubao-1.5-lite benchmark response generation through the Volcengine Ark inference endpoint.

Doubao-1.5-lite.py

Code S14. Python script for anonymized and shuffled Qwen-3.5-plus automatic judging, answer-label randomization, JSON parsing, score aggregation, and bootstrap analysis.

run\_anonymized\_shuffled\_100\_judge.py

Code S15. Bootstrap confidence interval and paired-difference analysis for model comparison.

Bootstrap confidence interval and paired-difference analysis.py

Code S15a. Python script for GCMembraneBench weighting sensitivity analysis.

weighting sensitivity analysis.py

File S11. Full RAG records for Figure 5 and the three representative case studies.

all\_rag\_case\_records.json

File S12. Figure 5: Source-grounding materials.

figure5\_high\_flux\_interpretation\_full\_record.json

figure5\_high\_flux\_interpretation\_gcmembrane\_rag\_answer.txt

figure5\_high\_flux\_interpretation\_retrieval\_records.csv



File S13. Retrieved evidence records and GCMembrane-LLM output for Case 1: GO/CNT composite membranes.

case1\_gocnt\_transport\_selectivity\_full\_record.json  
case1\_gocnt\_transport\_selectivity\_gcmembrane\_rag\_answer.txt  
case1\_gocnt\_transport\_selectivity\_retrieval\_records.csv

File S14. Retrieved evidence records and GCMembrane-LLM output for Case 2: GO membrane swelling and salt rejection.

case2\_go\_swelling\_salt\_rejection\_full\_record.json  
case2\_go\_swelling\_salt\_rejection\_gcmembrane\_rag\_answer.txt  
case2\_go\_swelling\_salt\_rejection\_retrieval\_records.csv

File S15. Retrieved evidence records and GCMembrane-LLM output for Case 3: CNT membrane high flux and ion exclusion.

case3\_cnt\_flux\_ion\_exclusion\_full\_record.json  
case3\_cnt\_flux\_ion\_exclusion\_gcmembrane\_rag\_answer.txt  
case3\_cnt\_flux\_ion\_exclusion\_retrieval\_records.csv

Code S16. Representative RAG case-study generation script.

run\_all\_rag\_v4\_final (1).py

### **Supplementary Abbreviations**

|      |                                    |
|------|------------------------------------|
| BF16 | Brain Floating Point 16-Bit Format |
| PEFT | Parameter-Efficient Fine-tuning    |
| YAML | YAML Ain't Markup Language         |
